# Supplementary material for: Impacts of land use change on native plant-butterfly interaction networks from central Mexico
Source: PeerJ. 2023 Oct 11;11:e16205. doi: 10.7717/peerj.16205 (PMC10576501; doi:10.7717/peerj.16205)
Supplement: Supplemental Information 2 — The interaction matrices were used to construct the networks and obtain data regarding the number of links and interactions for each of the three sampling sites. [file peerj-11-16205-s002.xls]

## Sheet: Native forest site
plants/butterflies	Am.fim	An.lim	Au.cel	Ba.phi	Ca.eth	Ca.nim	Ch.ehr	Co.ces	Da.ere	Da.gil	Di.jun	Di.mon	Ec.iso	El.can	Eu.cla	Eu.heg	Ju.coe	Le.ari	Pa.mul	Ph.sen	Pi.gyr	Po.mel	Sa.poli	Th.dor	Va.ann
Bi.odo	0	0	0	0	0	0	0	0	0	0	2	0	0	0	0	0	0	0	0	0	0	0	0	0	2
Bo.ter	0	0	1	73	0	0	0	5	6	4	12	5	0	3	0	0	0	1	47	35	0	0	0	0	4
Co.cor	0	0	0	0	0	0	0	0	0	0	0	0	0	0	0	0	0	0	0	0	0	0	0	0	1
Da.coc	0	0	0	0	0	0	0	0	0	1	0	5	0	0	0	0	0	0	4	0	0	0	0	0	0
Ec.cru	0	1	0	0	0	0	0	0	0	0	0	0	0	0	0	0	0	0	0	0	0	0	0	0	0
Eu.sp	0	0	0	0	0	1	0	0	0	0	0	0	0	0	0	0	0	0	0	0	0	0	2	0	0
Ey.pol	0	0	4	0	0	0	0	0	0	0	0	0	0	0	0	0	0	0	0	0	0	0	0	0	0
Ip.pur	0	0	0	0	0	0	0	0	2	0	0	0	0	0	0	0	0	0	0	0	0	0	0	0	0
Lo.mex	0	0	0	0	0	0	0	0	0	0	0	0	0	0	0	5	0	0	0	3	0	0	0	0	0
Mo.sp	0	6	0	0	0	0	0	0	0	0	0	0	0	0	0	0	0	0	0	0	0	0	0	0	0
Sa.pol	0	0	0	0	2	0	0	0	0	0	0	0	0	0	0	0	0	0	0	0	0	0	0	0	0
Si.amp	0	0	0	0	0	0	0	0	0	0	3	0	0	0	0	0	0	0	0	0	0	0	0	0	2
St.ela	0	3	0	0	0	0	0	0	0	0	0	0	0	0	0	0	0	0	0	0	0	0	0	0	0
St.ser	0	0	0	0	0	0	0	0	11	5	7	0	1	0	5	7	2	2	0	0	0	0	0	0	0
Ti.tub	0	0	0	1	0	0	0	0	0	0	0	0	0	0	0	0	0	0	0	0	0	0	0	0	0
Ve.com	4	15	1	0	56	0	2	4	0	81	0	1	0	0	0	0	0	0	0	0	6	36	0	39	0

## Sheet: Agricultural site
	Ap.pro	Au.cel	Ba.phi	Bu.alb	Ca.nim	Ch.ehr	Co.ces	Co.aur	Da.ple	Di.jun	Ec.iso	Eu.heg	Ga.jos	Le.ari	Pa.mul	Ph.sen	Pi.nap	Pi.gyr	Po.mel	Th.dor	Va.ann
Ar.pla	0	0	1	0	0	0	0	0	0	0	0	0	2	0	2	0	0	0	0	0	0
Bi.odo	0	0	0	0	7	0	0	0	0	0	0	0	22	21	0	0	0	0	0	0	0
Bo.ter	0	0	0	0	0	0	0	0	0	0	0	0	0	0	0	2	0	0	0	0	0
De.vir	0	0	0	13	0	0	0	2	0	0	1	0	80	0	0	0	0	0	0	0	3
He.inu	0	0	0	0	3	0	0	0	0	0	0	0	1	0	2	0	0	0	0	0	0
Lo.mex	0	0	0	0	0	0	0	0	0	0	0	0	0	0	0	2	0	0	0	0	0
Me.his	0	0	0	0	0	0	0	0	0	0	0	0	0	3	0	0	0	0	0	0	0
Mi.acu	0	0	0	0	0	0	0	0	0	0	4	0	0	0	0	0	0	0	0	0	0
Mi.bif	1	0	0	0	0	0	0	0	0	0	0	0	0	0	0	0	0	0	0	0	0
Oe.gau	0	7	2	1	0	0	0	0	6	0	0	0	0	0	0	0	0	0	0	0	0
Op.tom	0	0	11	0	0	0	0	0	0	0	0	0	0	0	0	0	0	0	0	0	0
Ri.com	0	0	0	0	0	0	0	0	0	0	0	0	0	0	3	0	0	0	0	0	0
Sa.pol	0	0	0	0	0	0	0	0	0	0	0	0	0	2	0	0	0	0	0	0	0
Si.amp	0	0	0	0	0	0	3	0	0	0	0	0	0	0	0	0	0	0	0	0	0
Ta.ere	0	0	0	0	0	0	2	0	0	7	0	0	0	1	0	0	0	0	0	0	7
Ta.off	0	0	0	0	11	0	0	0	0	0	0	0	0	1	0	0	9	0	0	0	0
Ti.tub	0	0	19	0	10	2	2	0	0	6	0	6	0	16	0	0	0	0	0	0	3
Ve.com	0	0	0	0	0	0	0	0	0	0	0	0	0	26	0	0	0	20	14	9	0

## Sheet: Urban site
	Am.fim	At.cam	Au.cel	Ba.phi	Bu.alb	Ca.nim	Ch.ehr	Ch.mar	Da.ple	Di.jun	Do.hew	Ec.iso	Eu.heg	Eu.sal	Le.ari	Pa.gar	Pa.mul	Pa.pha	Ph.sen	Pi.nap	Po.mel	Po.zab	Va.ann	Va.car
Ag.afr	0	0	0	16	0	0	0	0	0	0	0	0	0	0	0	0	0	0	0	0	0	0	0	0
Ag.foe	0	0	7	0	0	0	0	0	0	0	1	0	0	0	0	0	0	0	0	0	0	0	0	0
Ag.mex	0	0	0	0	0	0	1	0	0	0	9	0	0	0	0	0	0	0	0	0	0	0	0	0
Al.cep	0	0	0	0	0	0	6	0	0	0	0	0	0	0	0	0	0	0	0	0	0	0	0	0
Al.mac	0	0	5	0	0	0	0	0	0	0	0	0	0	0	0	0	0	0	0	0	0	0	0	0
As.ang	0	0	0	0	0	0	1	0	0	0	0	0	0	0	0	0	0	0	0	0	0	0	0	0
Bi.odo	0	0	0	0	0	0	0	0	0	0	0	0	1	0	10	0	0	0	0	0	0	0	0	0
Bou.sp	0	0	0	16	0	0	0	0	0	0	0	0	0	0	0	0	50	0	0	0	0	0	0	0
Bo.ter	0	0	0	0	0	0	0	0	0	0	0	0	0	0	0	0	1	0	1	0	0	0	0	0
Ca.rap	0	0	0	0	0	0	0	0	0	0	0	0	0	0	0	0	0	0	0	3	0	0	0	0
Ch.nob	0	0	0	1	0	0	0	0	0	0	0	0	0	0	0	0	0	0	0	0	0	0	0	0
Chr.sp	0	0	0	2	0	0	3	0	0	0	0	0	0	0	10	0	0	0	0	0	0	0	3	0
Cy.sco	0	0	0	0	0	1	0	0	0	0	0	0	0	0	0	0	0	0	0	0	0	0	0	0
Di.iri	0	1	0	0	0	0	0	0	0	0	0	0	0	0	1	0	0	0	0	0	0	0	0	0
Ec.pur	0	0	0	15	0	0	0	0	0	0	0	0	0	0	0	0	1	0	0	0	0	0	0	0
Ec.vul	0	0	10	0	0	0	0	0	0	0	0	0	0	0	20	0	0	0	0	0	0	0	0	0
He.inu	0	0	0	0	0	0	5	0	0	0	0	0	0	0	0	0	2	0	0	0	0	0	0	7
Ip.coc	0	0	0	0	0	0	0	0	0	0	0	0	0	0	2	0	0	0	0	0	0	0	0	0
La.cam	0	14	0	0	0	0	0	0	0	22	0	0	7	3	42	0	0	0	0	0	0	0	0	0
Lav.sp	0	0	0	0	0	0	0	0	0	0	0	0	0	0	4	0	0	0	0	0	0	0	0	0
Li.usi	9	0	12	0	0	0	3	0	0	0	0	5	0	0	0	0	0	0	0	0	0	0	0	0
Me.off	0	0	0	0	0	0	0	0	0	0	0	0	0	0	0	0	17	0	0	0	0	0	0	0
Me.spi	2	0	6	0	0	0	25	0	0	0	0	0	0	0	0	0	0	0	0	5	0	0	0	0
Ne.ole	0	0	0	0	0	0	0	0	0	0	0	0	0	0	0	0	0	0	0	0	0	0	1	0
Oe.gau	0	0	6	0	0	0	0	0	0	0	0	0	0	0	0	0	0	0	0	0	0	0	0	0
Ph.phi	0	0	0	0	0	0	0	0	0	0	0	0	0	0	1	0	0	0	0	0	0	0	0	0
Pl.maj	0	0	0	0	0	0	0	0	0	0	0	0	0	0	0	0	0	0	0	0	1	0	0	0
Po.ole	0	0	0	0	0	0	0	0	0	0	0	0	0	0	0	0	0	0	0	2	0	0	0	0
Pr.per	0	0	0	0	0	0	0	0	3	0	0	0	0	0	0	0	0	0	0	0	0	0	0	0
Pr.ser	0	0	0	0	0	0	0	0	0	0	0	0	1	0	1	0	1	0	0	0	0	0	0	0
Ros.1	0	0	0	0	0	0	0	0	0	0	0	0	0	0	0	0	1	0	0	0	0	0	0	0
Ros.2	0	0	0	0	0	0	1	0	0	0	0	0	0	0	1	0	0	0	0	0	0	0	0	0
Sa.his	0	0	0	0	0	0	0	0	0	0	0	0	0	0	0	0	0	0	0	1	0	0	0	0
Sa.off	0	0	39	0	0	0	0	0	0	0	0	0	0	0	0	0	0	0	0	0	0	5	0	0
Si.amp	0	0	0	0	0	0	1	0	0	0	0	0	0	0	0	0	0	0	0	0	0	0	0	0
So.ang	0	0	0	0	0	0	0	0	0	0	0	0	0	0	2	0	0	0	0	0	0	0	0	0
Sy.nov	0	0	0	0	0	0	0	0	0	0	0	0	0	0	0	0	0	0	0	1	0	0	0	0
Ta.ere	0	0	1	0	0	0	0	0	0	11	0	0	0	0	0	0	0	7	0	0	0	0	0	0
Ta.off	0	0	0	0	0	4	0	0	0	0	0	0	0	0	0	1	0	0	0	3	0	0	1	0
Th.vul	0	0	0	0	0	0	0	3	0	0	0	0	0	0	0	0	0	0	0	0	0	0	0	0
Ti.tub	0	0	0	2	0	0	0	0	0	0	0	0	0	0	7	0	0	0	0	0	0	0	0	0
Tu.vio	0	0	0	0	0	0	3	0	0	0	0	0	0	0	6	0	0	0	0	8	0	0	0	0
Va.off	0	2	0	0	0	5	0	0	0	0	0	0	0	0	0	0	0	0	0	0	0	0	0	0
No.ide	0	1	0	1	1	0	0	0	0	0	0	0	0	0	0	0	0	0	0	0	0	0	0	0

## Sheet: Number of links
Network type	Plant type	Links	week
Native	Native	6	1
Native	Alien	0	1
Agriculture	Native	1	1
Agriculture	Alien	0	1
Urban	Native	2	1
Urban	Alien	1	1
Native	Native	0	2
Native	Alien	0	2
Agriculture	Native	4	2
Agriculture	Alien	0	2
Urban	Native	3	2
Urban	Alien	0	2
Native	Native	2	3
Native	Alien	0	3
Agriculture	Native	2	3
Agriculture	Alien	0	3
Urban	Native	1	3
Urban	Alien	2	3
Native	Native	4	4
Native	Alien	0	4
Agriculture	Native	4	4
Agriculture	Alien	0	4
Urban	Native	2	4
Urban	Alien	0	4
Native	Native	0	5
Native	Alien	0	5
Agriculture	Native	2	5
Agriculture	Alien	0	5
Urban	Native	2	5
Urban	Alien	3	5
Native	Native	1	6
Native	Alien	0	6
Agriculture	Native	1	6
Agriculture	Alien	0	6
Urban	Native	2	6
Urban	Alien	2	6
Native	Native	1	7
Native	Alien	0	7
Agriculture	Native	1	7
Agriculture	Alien	0	7
Urban	Native	0	7
Urban	Alien	1	7
Native	Native	0	8
Native	Alien	0	8
Agriculture	Native	0	8
Agriculture	Alien	0	8
Urban	Native	0	8
Urban	Alien	1	8
Native	Native	0	9
Native	Alien	0	9
Agriculture	Native	0	9
Agriculture	Alien	0	9
Urban	Native	0	9
Urban	Alien	2	9
Native	Native	0	10
Native	Alien	0	10
Agriculture	Native	1	10
Agriculture	Alien	1	10
Urban	Native	0	10
Urban	Alien	3	10
Native	Native	0	11
Native	Alien	0	11
Agriculture	Native	1	11
Agriculture	Alien	2	11
Urban	Native	0	11
Urban	Alien	0	11
Native	Native	0	12
Native	Alien	0	12
Agriculture	Native	3	12
Agriculture	Alien	0	12
Urban	Native	1	12
Urban	Alien	0	12
Native	Native	0	13
Native	Alien	0	13
Agriculture	Native	1	13
Agriculture	Alien	2	13
Urban	Native	0	13
Urban	Alien	0	13
Native	Native	0	14
Native	Alien	0	14
Agriculture	Native	3	14
Agriculture	Alien	0	14
Urban	Native	1	14
Urban	Alien	0	14
Native	Native	0	15
Native	Alien	0	15
Agriculture	Native	1	15
Agriculture	Alien	0	15
Urban	Native	0	15
Urban	Alien	3	15
Native	Native	0	16
Native	Alien	0	16
Agriculture	Native	1	16
Agriculture	Alien	0	16
Urban	Native	1	16
Urban	Alien	5	16
Native	Native	0	17
Native	Alien	0	17
Agriculture	Native	2	17
Agriculture	Alien	0	17
Urban	Native	1	17
Urban	Alien	2	17
Native	Native	0	18
Native	Alien	0	18
Agriculture	Native	1	18
Agriculture	Alien	0	18
Urban	Native	2	18
Urban	Alien	5	18
Native	Native	0	19
Native	Alien	0	19
Agriculture	Native	0	19
Agriculture	Alien	0	19
Urban	Native	1	19
Urban	Alien	7	19
Native	Native	0	20
Native	Alien	0	20
Agriculture	Native	1	20
Agriculture	Alien	0	20
Urban	Native	2	20
Urban	Alien	1	20
Native	Native	2	21
Native	Alien	0	21
Agriculture	Native	1	21
Agriculture	Alien	0	21
Urban	Native	1	21
Urban	Alien	3	21
Native	Native	4	22
Native	Alien	0	22
Agriculture	Native	1	22
Agriculture	Alien	0	22
Urban	Native	1	22
Urban	Alien	1	22
Native	Native	4	23
Native	Alien	0	23
Agriculture	Native	2	23
Agriculture	Alien	0	23
Urban	Native	2	23
Urban	Alien	0	23
Native	Native	4	24
Native	Alien	0	24
Agriculture	Native	2	24
Agriculture	Alien	0	24
Urban	Native	3	24
Urban	Alien	3	24

## Sheet: Number of interactions
Network type	Interactions	Week	Plant type
Agriculture	28	1	Native
Natural	84	1	Native
Urban	10	1	Alien
Urban	13	1	Native
Urban	1	2	Alien
Urban	2	2	Native
Natural	37	2	Native
Agriculture	4	2	Native
Urban	9	3	Alien
Agriculture	23	3	Native
Urban	25	4	Native
Natural	35	4	Native
Agriculture	14	4	Native
Urban	8	5	Alien
Urban	10	5	Native
Agriculture	10	5	Native
Urban	5	6	Native
Urban	11	6	Alien
Agriculture	4	6	Native
Natural	4	6	Native
Agriculture	7	7	Native
Natural	1	7	Native
Urban	2	7	Alien
Urban	3	8	Alien
Urban	11	11	Alien
Agriculture	20	11	Alien
Agriculture	51	11	Native
Agriculture	4	12	Alien
Agriculture	23	12	Native
Urban	3	14	Alien
Agriculture	24	14	Native
Urban	84	15	Alien
Agriculture	13	15	Native
Urban	1	16	Native
Urban	28	16	Alien
Agriculture	5	16	Native
Urban	5	17	Alien
Urban	25	17	Native
Agriculture	4	17	Native
Agriculture	1	18	Native
Urban	14	18	Native
Urban	51	18	Alien
Urban	3	19	Native
Urban	62	19	Alien
Urban	21	20	Native
Urban	6	20	Alien
Agriculture	2	21	Native
Urban	10	21	Native
Natural	30	21	Native
Urban	19	21	Alien
Agriculture	22	22	Native
Urban	1	22	Native
Urban	16	22	Alien
Natural	96	22	Native
Agriculture	7	23	Native
Urban	17	23	Native
Natural	188	23	Native
Urban	1	24	Alien
Natural	38	24	Native
Agriculture	70	24	Native
Urban	36	24	Native

## Sheet: Codes Figure 2
Code	Butterfly species	Code	Plant species
1	Autochton cellus	a	Bidens odorata
2	Battus philenor	b	Bouvardia ternifolia
3	Catasticta nimbice	c	Tithonia tubiformis
4	Chlosyne ehrenbergii
5	Dione juno
6	Echinargus isola
7	Euptoieta hegesia
8	Leptophobia aripa
9	Papilio multicaudata
10	Phoebis sennae
11	Poanes melane
12	Vanessa anabella
